# Supplementary material for: Genomic Resources of Magnaporthe oryzae (GROMO): A comprehensive and integrated database on rice blast fungus
Source: PubMed Central journal article supplement (PMC2721851; doi:10.1186/1471-2164-10-316), 2009-07-15
Supplement: 1471-2164-10-316-S4.pdf [file 1471-2164-10-316-S4.pdf]

**Additional file 4: Description of information contained in different tables of relational database**

| <b>Table Name</b>    | <b>Description</b>                                                                               |
|----------------------|--------------------------------------------------------------------------------------------------|
| Summary              | Contains annotation, sequences and biochemical properties                                        |
| Domain_details       | Contains domain predicted using Pfam and SMART                                                   |
| Pathway_details      | Contains predicted pathways using KEGG                                                           |
| Localization_details | Contains predicted localization information                                                      |
| Sumoylation_details  | Contains sumoylation sites predicted using SUMOsp 2.0                                            |
| Mutants_details      | Contains mutant data obtained from MGOS and ATMT database                                        |
| Expression_details   | Contains EST, MPSS and SAGE data obtained from MGOS and <i>Magnaporthe oryzae</i> MPSS database. |
| Interaction_details  | Contains probable interactions predicted using CCSB database                                     |
